# Supplementary material for: The mutation rate of mycobacterial repetitive unit loci in strains of M. tuberculosis from cynomolgus macaque infection
Source: PubMed Central journal article supplement (PMC3635867; doi:10.1186/1471-2164-14-145), 2013-03-05

Supplemental Figure 1

a)

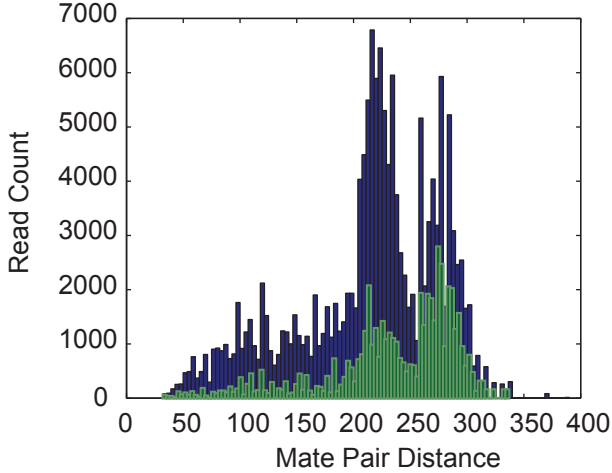

b)

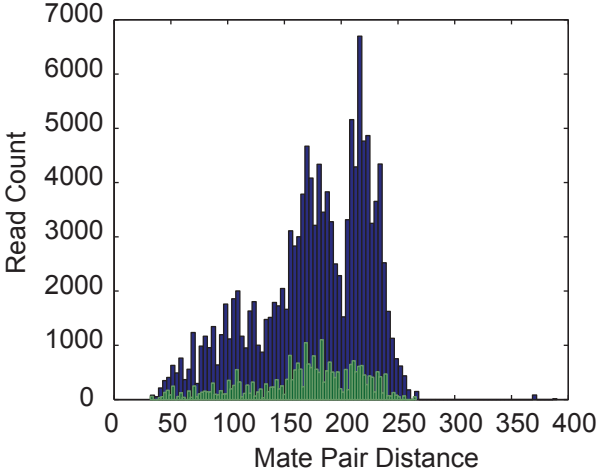

Supplement: 1471-2164-14-145-S1.pdf [file 1471-2164-14-145-S1.pdf]
